# Supplementary material
Source: PubMed Central journal article supplement (PMC9123252)
Supplement: yam-65-111-s001.pdf [file yam-65-111-s001.pdf]

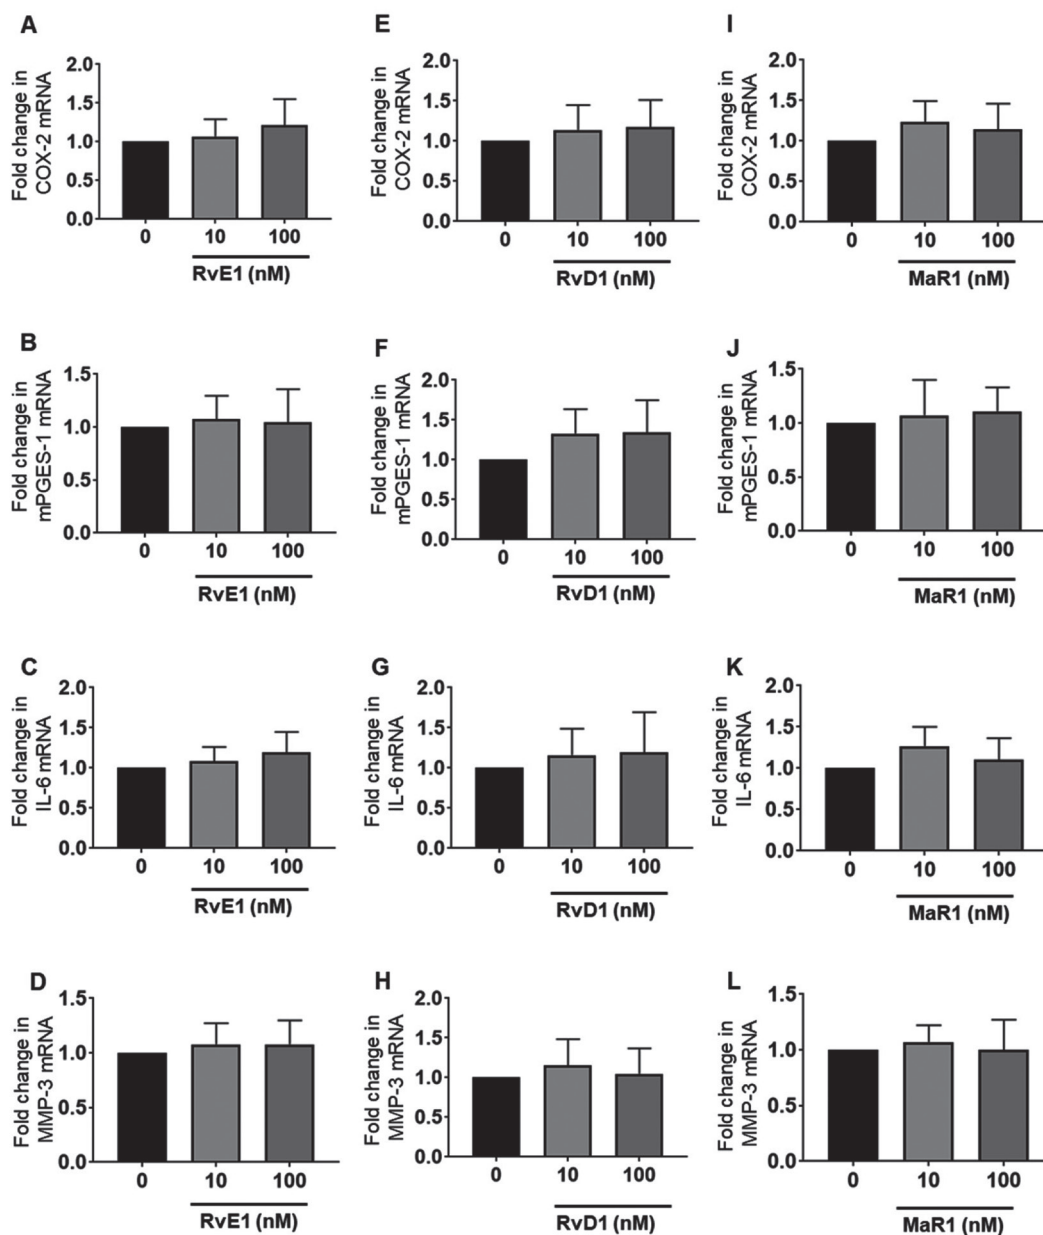

**Supplementary Fig. S1.** Effects of SPMs on MH7A cells. MH7A cells were cultured with or without 10 nM and 100 nM RvE1, RvD1, and maresin-1 (MaR1) without TNF- $\alpha$  for 12 h. The effects of RvE1 on the following substances were examined using real-time PCR: the mRNA expression levels of COX-2 (A), mPGES-1 (B), IL-6 (C), MMP-3 (D), or RvD1 on COX-2 (E), mPGES-1 (F), IL-6 (G), and MMP-3 (H) or MaR1 on COX-2 (I), mPGES-1 (J), IL-6 (K), and MMP-3 (L). The plots represent three independent experiments. Data are presented as the mean  $\pm$  SEM of three independent experiments.
