# Supplementary material
Source: PubMed Central journal article supplement (PMC9123252)
Supplement: yam-65-111-s002.pdf [file yam-65-111-s002.pdf]

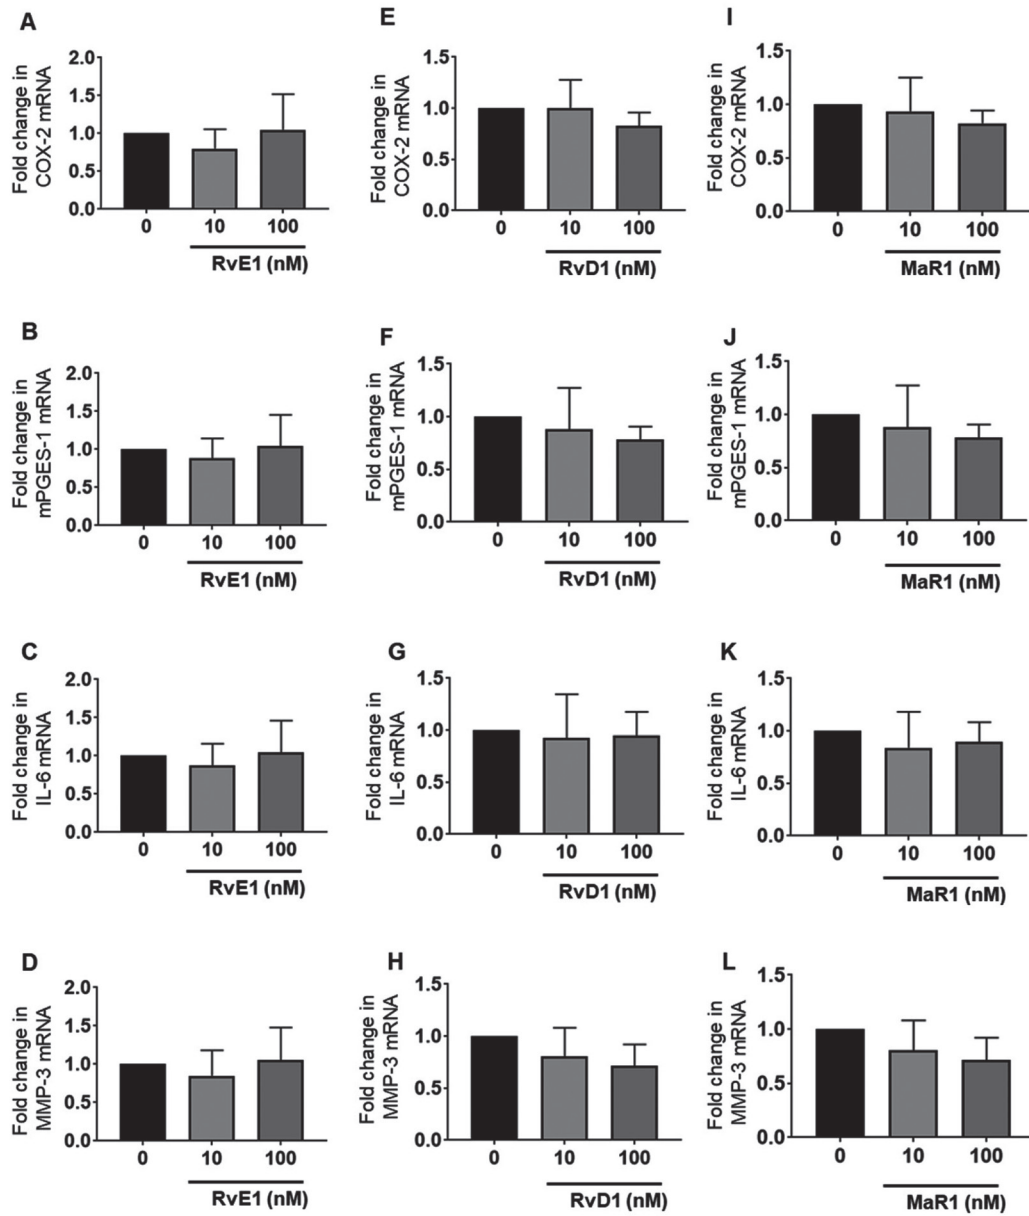

**Supplementary Fig. S2.** Effects of SPMs on osteoarthritis-derived synovial fibroblasts. OA fibroblasts were cultured with or without 10 nM and 100 nM RvE1, RvD1, and maresin-1 (MaR1) without TNF- $\alpha$  for 12 h. The effects of RvE1 on the following substances were examined using real-time PCR: the mRNA expression levels of COX-2 (**A**), mPGES-1 (**B**), IL-6 (**C**), MMP-3 (**D**), or RvD1 on COX-2 (**E**), mPGES-1 (**F**), IL-6 (**G**), and MMP-3 (**H**) or MaR1 on COX-2 (**I**), mPGES-1 (**J**), IL-6 (**K**), and MMP-3 (**L**). The plots represent three independent experiments. Data are presented as the mean  $\pm$  SEM of three independent experiments.
