# Supplementary material
Source: PubMed Central journal article supplement (PMC9123252)
Supplement: yam-65-111-s003.pdf [file yam-65-111-s003.pdf]

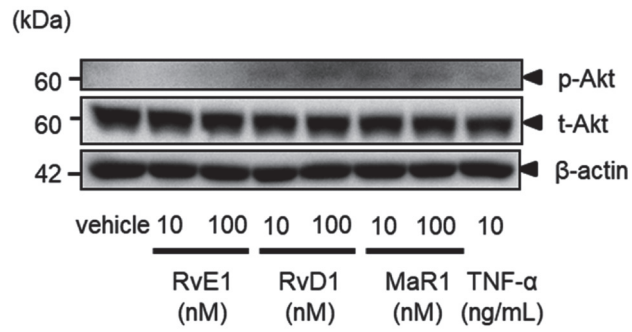

**Supplementary Fig. S3.** Effects of SPMs on Akt in MH7A cells. Effects of SPMs on Akt without TNF- $\alpha$  in MH7A cells. MH7A cells were cultured with 10 nM and 100 nM RvE1, RvD1, and MaR1 without TNF- $\alpha$  for 15 min. The expression of Akt in cell lysates was determined by western blot analysis.
